# Supplementary material
Source: MDPI journal article supplement (https://www.mdpi.com/2073-4395/13/3/638)
Supplement: s1 [file s1]

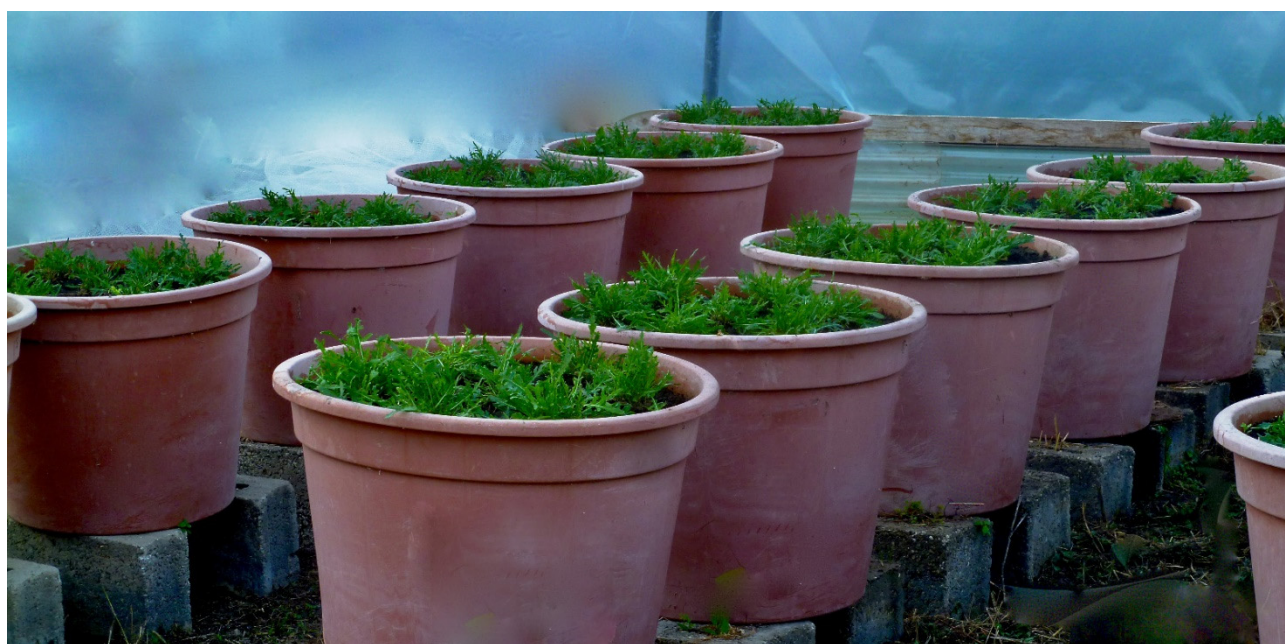

**Figure S1.** Pots used for the growth of Rocket plants under the two greenhouse plastic films.

**Table S1.** Trend of average temperature during the whole growing period under the two greenhouse plastic films (Film1: diffuse-light film; Film2: clear film).

| Months   | Ten-Days | Film1 | Film2 |
|----------|----------|-------|-------|
| °C       |          |       |       |
| October  | I        | 17.6  | 17.5  |
|          | II       | 17.7  | 17.6  |
|          | III      | 17.6  | 17.4  |
| November | I        | 18.0  | 17.4  |
|          | II       | 16.2  | 16.0  |
|          | III      | 14.2  | 14.1  |
| December | I        | 12.1  | 12.0  |
|          | II       | 13.2  | 13.1  |
|          | III      | 16.1  | 16.0  |
| January  | I        | 12.2  | 11.5  |
|          | II       | 11.1  | 10.7  |
|          | III      | 15.5  | 15.2  |
| February | I        | 16.2  | 15.8  |
|          | II       | 14.9  | 13.4  |
|          | III      | 14.9  | 15.0  |
| March    | I        | 14.1  | 14.4  |
|          | II       | 11.0  | 12.4  |
|          | III      | 12.1  | 13.9  |
| April    | I        | 11.7  | 14.0  |
|          | II       | 12.8  | 15.2  |
|          | III      | 22.3  | 23.5  |
| May      | I        | 23.3  | 24.6  |
|          | II       | 24.7  | 23.1  |
|          | III      | 28.4  | 28.0  |
